# Supplementary material
Source: Research Square preprint supplement (doi:10.21203/rs.3.rs-9097906/v1)
Supplement: Supplementary file 1 [file 34c2c5683a757c80b69fa62b.docx]

**Table 1** Characteristics of the three experimental sites

| **Parameter** | **Bursa** | **Eskişehir** | **Tokat** |
| --- | --- | --- | --- |
| **Ecological region** | Marmara | Central Anatolia | Central Black Sea |
| **Latitude (°N)** | 40.18 | 39.78 | 40.31 |
| **Longitude (°E)** | 29.06 | 30.52 | 36.55 |
| **Altitude (m a.s.l.)** | 95 | 800 | 623 |
| **Mean GS temp.ᵃ (°C)** | 23.9 | 21.2 | 22.4 |
| **Total GS precip.ᵃ (mm)** | 115 | 95 | 140 |
| **Mean GS RHᵃ (%)** | 68 | 55 | 63 |
| **Soil texture** | Clay loam | Sandy loam | Loam |
| **pH / organic matter (%)** | 7.2 / 2.1 | 7.6 / 1.4 | 7.0 / 2.3 |

**Table 2** Plant height (cm) of twelve basil genotypes at three Turkish ecological sites; means of Year 1 and Year 2

| **Genotype** | **Bursa** | **Eskişehir** | **Tokat** | **Year 1 mean** | **Year 2 mean** |
| --- | --- | --- | --- | --- | --- |
| R-1 | 36.5 | 28.5 | 45.5 | 36.8 | 36.1 |
| R-3k | 48.7 | 48.6 | 57.1 | 51.5 | 50.8 |
| R-4 | 45.1 | 38.3 | 52.9 | 45.4 | 44.7 |
| R-10A | 67.8 | 47.5 | 69.5 | 61.6 | 60.9 |
| R-15 | 35.9 | 30.5 | 39.9 | 35.4 | 34.7 |
| R-16 | 39.1 | 35.1 | 47.1 | 40.4 | 39.7 |
| R-17 | 68.9 | 48.8 | 65.3 | 61.0 | 60.3 |
| R-19 | 34.5 | 30.7 | 41.2 | 35.5 | 34.8 |
| R-20 | 38.3 | 30.6 | 40.2 | 36.4 | 35.7 |
| R-23 | 40.5 | 33.7 | 46.5 | 40.2 | 39.5 |
| Y-7 | 48.7 | 30.9 | 46.2 | 41.9 | 41.2 |
| Y-15 | 48.2 | 33.3 | 46.5 | 42.7 | 42.0 |
| **Location mean** | **46.0 bᵃ** | **36.4 c** | **49.8 a** | **—** | **—** |

**Table 3** Fresh herb yield (FHY, kg ha⁻¹) of twelve basil genotypes at three Turkish ecological sites; Year 1 and Year 2

| **Genotype** | **Bursa** | **Eskişehir** | **Tokat** | **Year 1 mean** | **Year 2 mean** |
| --- | --- | --- | --- | --- | --- |
| R-1 | 5577 | 3935 | 9720 | 6411 | 7693 |
| R-3k | 10205 | 8699 | 12375 | 10426 | 12512 |
| R-4 | 11113 | 9704 | 13267 | 11361 | 13634 |
| R-10A | 23076 | 10971 | 17625 | 17224 | 20669 |
| R-15 | 8506 | 7980 | 10512 | 8999 | 10799 |
| R-16 | 6400 | 6430 | 13506 | 8779 | 10534 |
| R-17 | 15998 | 10700 | 18137 | 14945 | 17934 |
| R-19 | 8045 | 7736 | 11423 | 9068 | 10882 |
| R-20 | 10131 | 7730 | 10653 | 9505 | 11406 |
| R-23 | 11119 | 8300 | 12494 | 10638 | 12765 |
| Y-7 | 17728 | 8824 | 12980 | 13177 | 15813 |
| Y-15 | 13259 | 7758 | 12315 | 11111 | 13333 |
| **Location mean** | **11,764 bᵃ** | **8,232 c** | **12,918 a** | **—** | **—** |

**Table 4** Rosmarinic acid (RA) and chicoric acid (CA) (mg 100 g⁻¹ DW) of twelve basil genotypes at three Turkish ecological sites. Values are two-year means ± SD. SD, standard deviation of two-year plot means (n = 6 plots per genotype–location). Eski., Eskişehir. DW, dry weight

| **Genotype** | **RA Bursa** | **RA Eski.** | **RA Tokat** | **RA mean** | **CA Bursa** | **CA Eski.** | **CA Tokat** | **CA mean** |
| --- | --- | --- | --- | --- | --- | --- | --- | --- |
| R-1 | 58.4 ± 2.1 | 78.5 ± 3.4 | 95.7 ± 4.1 | 77.5 | 20.1 ± 0.9 | 36.8 ± 1.5 | 19.0 ± 0.8 | 25.3 |
| R-3k | 56.3 ± 2.0 | 62.8 ± 2.6 | 104.4 ± 4.5 | 74.5 | 34.8 ± 1.6 | 17.3 ± 0.7 | 57.6 ± 2.4 | 36.6 |
| R-4 | 63.4 ± 2.4 | 67.1 ± 2.9 | 110.6 ± 5.0 | 80.4 | 22.9 ± 1.0 | 27.9 ± 1.2 | 56.2 ± 2.3 | 35.7 |
| R-10A | 57.3 ± 2.1 | 72.3 ± 3.1 | 108.2 ± 4.8 | 79.3 | 27.7 ± 1.2 | 39.9 ± 1.8 | 40.7 ± 1.7 | 36.1 |
| R-15 | 55.0 ± 1.9 | 69.2 ± 2.8 | 95.9 ± 4.0 | 73.4 | 30.2 ± 1.3 | 28.8 ± 1.3 | 27.5 ± 1.1 | 28.8 |
| R-16 | 34.3 ± 1.4 | 45.8 ± 1.8 | 68.6 ± 2.8 | 49.6 | 6.9 ± 0.3 | 17.0 ± 0.7 | 12.8 ± 0.5 | 12.2 |
| R-17 | 37.2 ± 1.5 | 57.6 ± 2.4 | 98.4 ± 4.2 | 64.4 | 14.9 ± 0.6 | 36.5 ± 1.5 | 70.7 ± 3.1 | 40.7 |
| R-19 | 61.5 ± 2.5 | 73.2 ± 3.1 | 118.0 ± 5.3 | 84.2 | 33.5 ± 1.5 | 40.3 ± 1.7 | 94.6 ± 4.1 | 56.1 |
| R-20 | 47.6 ± 1.8 | 56.2 ± 2.3 | 77.8 ± 3.2 | 60.5 | 24.1 ± 1.0 | 12.4 ± 0.5 | 18.7 ± 0.8 | 18.4 |
| R-23 | 64.9 ± 2.7 | 80.4 ± 3.5 | 131.8 ± 6.0 | 92.4 | 37.7 ± 1.7 | 55.5 ± 2.4 | 100.7 ± 4.5 | 64.6 |
| Y-7 | 43.9 ± 1.7 | 52.7 ± 2.1 | 88.7 ± 3.7 | 61.8 | 19.5 ± 0.8 | 20.0 ± 0.9 | 47.8 ± 2.0 | 29.1 |
| Y-15 | 38.4 ± 1.5 | 52.2 ± 2.0 | 80.3 ± 3.4 | 57.0 | 10.2 ± 0.4 | 14.6 ± 0.6 | 25.2 ± 1.1 | 16.7 |
| **Location mean** | **51.5 ± 2.2 bᵃ** | **64.0 ± 2.9 b** | **98.2 ± 4.5 a** | **—** | **23.5 ± 1.0 cᵇ** | **28.9 ± 1.3 b** | **47.6 ± 2.1 a** | **—** |

**Table 5** Total phenolic content (TPC, mg GAE g⁻¹ DW), ABTS, DPPH, and FRAP antioxidant capacity (µmol TEAC g⁻¹ DW) of twelve basil genotypes at three Turkish ecological sites. Values are two-year means ± SD. Developmental stage data (vegetative, flowering onset, full flowering) in Fig. 5 are from the Bursa site only

| **Genotype** | **TPC Bursa** | **TPC Eski.** | **TPC Tokat** | **TPC mean** | | **ABTS Bursa** | **ABTS Eski.** | **ABTS Tokat** | **DPPH Bursa** | **DPPH Eski.** | **DPPH Tokat** | **FRAP Bursa** | **FRAP Eski.** | **FRAP Tokat** |
| --- | --- | --- | --- | --- | --- | --- | --- | --- | --- | --- | --- | --- | --- | --- |
| R-1 | 7.5±0.3 | 9.7±0.4 | 9.6±0.4 | 8.9 | 233±9 | | 419±17 | 312±12 | 93±4 | 173±7 | 128±5 | 123±5 | 184±8 | 165±7 |
| R-3k | 7.7±0.3 | 10.2±0.5 | 16.0±0.7 | 11.3 | 202±8 | | 391±16 | 589±24 | 100±4 | 172±7 | 337±14 | 140±6 | 203±9 | 320±13 |
| R-4 | 9.4±0.4 | 10.6±0.5 | 16.5±0.8 | 12.2 | 237±10 | | 326±13 | 507±21 | 114±5 | 135±6 | 257±11 | 148±6 | 167±7 | 297±12 |
| R-10A | 12.5±0.6 | 14.7±0.7 | 16.0±0.7 | 14.4 | 278±11 | | 493±20 | 526±21 | 136±6 | 357±15 | 340±14 | 179±8 | 291±12 | 283±11 |
| R-15 | 7.5±0.3 | 8.6±0.4 | 9.6±0.4 | 8.6 | 189±8 | | 331±14 | 377±15 | 79±3 | 160±7 | 239±10 | 120±5 | 210±9 | 248±10 |
| R-16 | 8.0±0.3 | 11.5±0.6 | 16.9±0.8 | 12.1 | 171±7 | | 413±17 | 486±20 | 60±2 | 146±6 | 235±10 | 98±4 | 186±8 | 193±8 |
| R-17 | 8.5±0.4 | 12.7±0.6 | 16.7±0.8 | 12.6 | 311±13 | | 416±17 | 572±23 | 108±5 | 277±12 | 353±14 | 139±6 | 241±10 | 278±11 |
| R-19 | 8.1±0.3 | 10.6±0.5 | 16.7±0.8 | 11.8 | 179±7 | | 315±13 | 306±12 | 103±4 | 170±7 | 387±16 | 165±7 | 213±9 | 331±14 |
| R-20 | 8.4±0.4 | 10.5±0.5 | 13.0±0.6 | 10.6 | 364±15 | | 374±15 | 448±18 | 50±2 | 104±4 | 227±9 | 72±3 | 148±6 | 230±10 |
| R-23 | 14.1±0.6 | 14.1±0.7 | 16.9±0.8 | 15.0 | 290±12 | | 527±21 | 555±23 | 120±5 | 176±8 | 304±13 | 155±7 | 213±9 | 261±11 |
| Y-7 | 7.0±0.3 | 13.9±0.6 | 17.8±0.9 | 12.9 | 259±10 | | 323±13 | 539±22 | 114±5 | 229±10 | 293±12 | 193±8 | 246±10 | 265±11 |
| Y-15 | 7.4±0.3 | 10.4±0.5 | 15.0±0.7 | 10.9 | 288±12 | | 469±19 | 483±20 | 87±4 | 174±7 | 367±15 | 114±5 | 197±8 | 305±13 |
| **Loc. mean** | **8.8±0.4 cᵃ** | **11.5±0.5 b** | **15.1±0.7 a** | **—** | **251±11 cᵇ** | | **401±18 b** | **476±20 a** | **98±4 c** | **190±8 b** | **290±12 a** | **138±6 c** | **209±9 b** | **266±11 a** |

ᵃ TPC location means: p < 0.01 (Tukey HSD). ᵇ ABTS/DPPH/FRAP location means: p < 0.01. Eski., Eskişehir. GAE, gallic acid equivalent; TEAC, Trolox equivalent antioxidant capacity
